# Supplementary material for: Redox processes in Cu-binding proteins: the “in-between” states in intrinsically disordered peptides
Source: Royal Society of Chemistry journal article supplement (doi:10.1039/d3cs00443k), 2023-01-01
Supplement: d3cs00443k1.pdf [file d3cs00443k1.pdf]

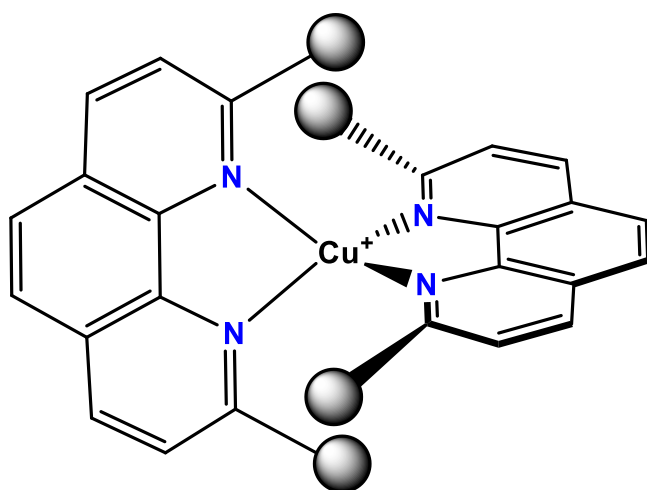

**Figure S1.** Bulky phenantroline-based ligands inducing Td geometry.

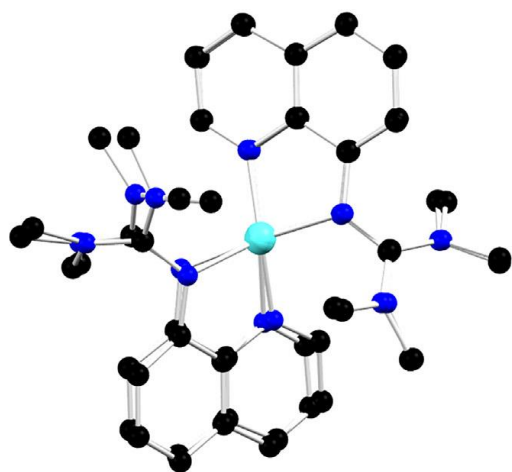

**Figure S2.** Superimposition of the molecular structures of  $[\text{Cu}^{\text{II}}(\text{TMGqu})_2]^{+2+}$ . From ref. <sup>[1]</sup>

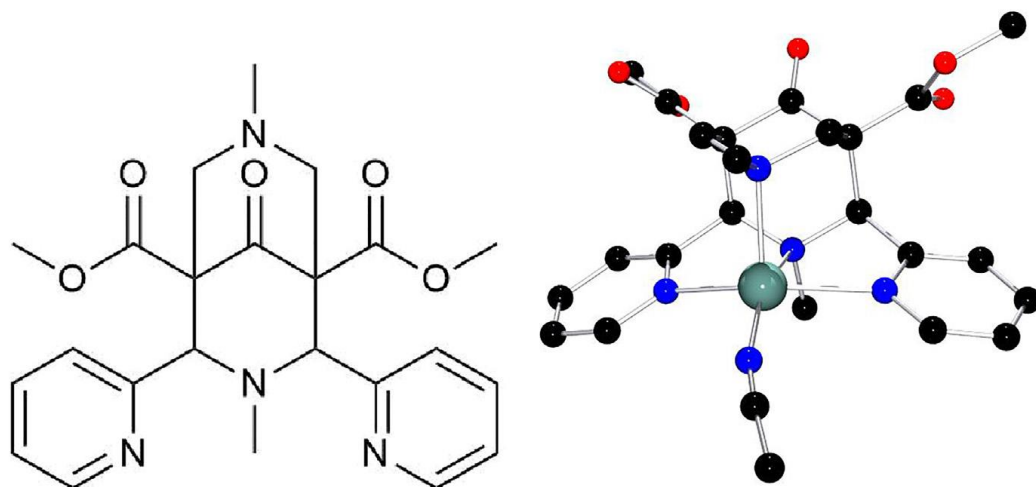

**Figure S3.** Scheme of a bispidine ligand and the corresponding cuprous complex that adopts a Cu(II) like SBP geometry. From <sup>[2]</sup>.

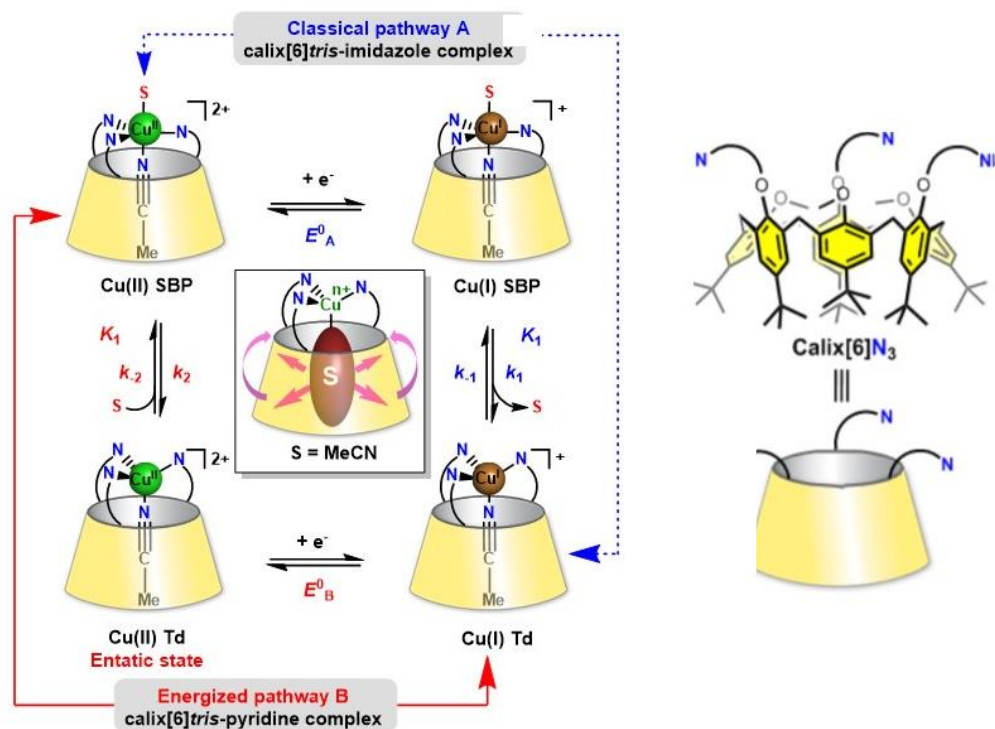

**Figure S4.** Supramolecular control of the electrochemical – chemical pathways by the calixarene cavity. With N-ligand = imidazole, pathway A: first reduction top Cu(I), then change in geometry from SBP to Td is observed. With N-ligand = pyridine, ‘entatic-like’ pathway B: first change in geometry from SBP to Td and then reduction to Cu(I). From ref. [3].

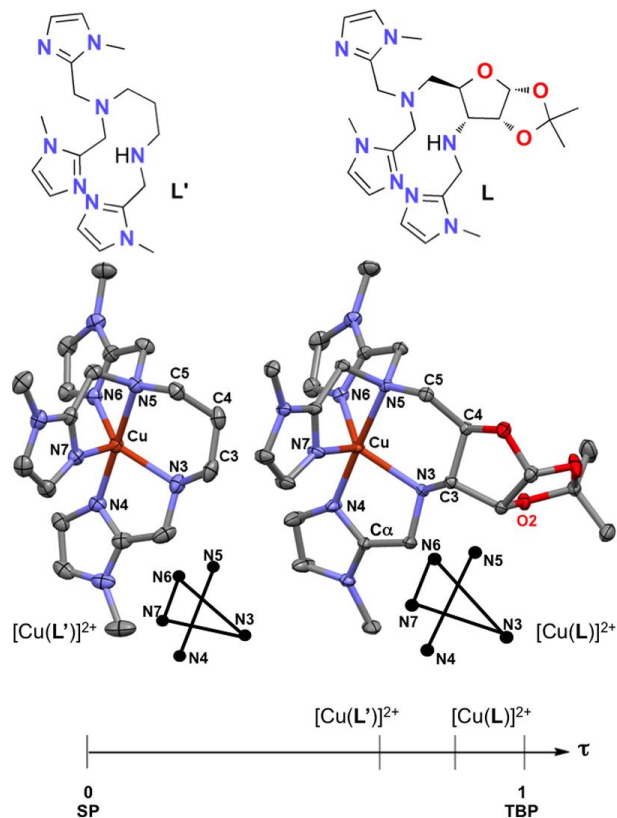

**Figure S5.** Structure of the glycoligand (L) and linear analogue (L') and of the corresponding X-ray [Cu<sup>II</sup>(L/L')]<sup>2+</sup> structures. From ref. [4].

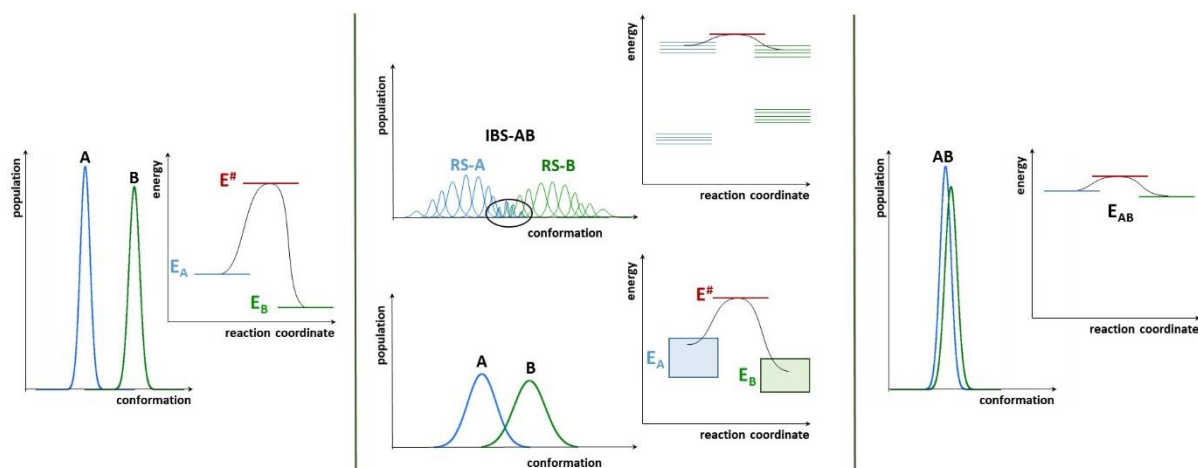

**Figure S6.** Different cases of Cu(I) - Cu(II) redox process in copper complexes. Left: classical case, middle: IBS mechanism (top) and ecstatic case (bottom), Right: Panel: Entatic. Two data are given: the population as a function of the conformation and the energy as function of a reaction coordinate. Subscripts A and B corresponds to the preferred environment for Cu(I) and Cu(II), respectively. AB to a geometry intermediate between A and B, RS to resting state, IBS to In-Between State, and # to the transition state.

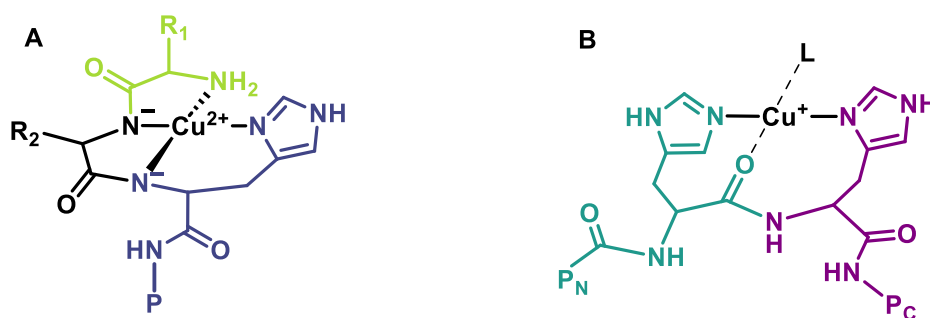

**Figure S7.** A: scheme of an ATCUN motif.<sup>[5]</sup>  $R_1$ ,  $R_2$  and P represent the side-chains of the first and second amino-acid residues and the C-terminal part of the peptide respectively. B: scheme of a bis-His binding motif.  $P_N$  and  $P_C$  represent the N-terminal and C-terminal sequence of the peptide, respectively. L is a possible additional ligand from the peptide.  $R_1$ ,  $R_2$ , P,  $P_N$  and  $P_C$  depends on the peptide under focus (human Ctr1 or histatins). For more details, see refs.<sup>[6-9]</sup>

## References

- [1] A. Hoffmann, S. Binder, A. Jesser, R. Haase, U. Flörke, M. Gnida, M. Salomone Stagni, W. Meyer-Klaucke, B. Lebsanft, L. E. Grünig, S. Schneider, M. Hashemi, A. Goos, A. Wetzel, M. Rübhausen, S. Herres-Pawlis, *Angew. Chem. Int. Ed.* **2014**, *53*, 299-304, **Catching an Entatic State—A Pair of Copper Complexes.**
- [2] H. Börzel, P. Comba, K. S. Hagen, C. Katsichtis, H. Pritzkow, *Chemistry – A European Journal* **2000**, *6*, 914-919, **A Copper(I) Oxygenation Precursor in the Entatic State: Two Isomers of a Copper(I) Compound of a Rigid Tetradentate Ligand.**
- [3] N. Le Poul, Y. Le Mest, I. Jabin, O. Reinaud, *Acc. Chem. Res.* **2015**, *48*, 2097-2106, **Supramolecular Modeling of Mono-copper Enzyme Active Sites with Calix[6]arene-based Funnel Complexes.**

- [4] L. Garcia, F. Cisnetti, N. Gillet, R. Guillot, M. Aumont-Nicaise, J.-P. Piquemal, M. Desmadril, F. Lambert, C. Policar, *J. Am. Chem. Soc.* **2015**, *137*, 1141-1146, ***Entasis through Hook-and-Loop factening in a glycoligand with cumulative weak forces stabilizing Cu(I)***.
- [5] P. Gonzalez, K. Bossak, E. Stefaniak, C. Hureau, L. Raibaut, W. Bal, P. Faller, *Chem. Eur. J.* **2018**, *24*, 8029-8041, ***N-terminal Cu Binding Motifs Xxx-Zzz-His (ATCUN) and Xxx-His and their derivatives: Chemistry, Biology and Medicinal Applications***.
- [6] S. E. Conklin, E. C. Bridgman, Q. Su, P. Riggs-Gelasco, K. L. Haas, K. J. Franz, *Biochemistry* **2017**, *56*, 4244-4255, ***Specific Histidine Residues Confer Histatin Peptides with Copper-Dependent Activity against Candida albicans***.
- [7] M. J. Pushie, K. Shaw, K. J. Franz, J. Shearer, K. L. Haas, *Inorg. Chem.* **2015**, *54*, 8544-8551, ***Model Peptide Studies Reveal a Mixed Histidine-Methionine Cu(I) Binding Site at the N-Terminus of Human Copper Transporter 1***.
- [8] N. B. Schulte, M. J. Pushie, A. Martinez, M. Sendzik, M. Escobedo, K. Kuter, K. L. Haas, *Inorg. Chem.* **2023**, *62*, 4021-4034, ***Exploration of the Potential Role of Serum Albumin in the Delivery of Cu(I) to Ctr1***.
- [9] S. Schwab, J. Shearer, S. E. Conklin, B. Alies, K. L. Haas, *J. Inorg. Biochem.* **2016**, *158*, 70-76, ***Sequence proximity between Cu(II) and Cu(I) binding sites of human copper transporter 1 model peptides defines reactivity with ascorbate and O<sub>2</sub>***.
